# Supplementary material for: Effect of potential difference between the central and terminal metals on the electron communication in an Fe–Ru–Fe cyanidometal-bridged mixed valence system
Source: Royal Society of Chemistry journal article supplement (doi:10.1039/d2qi00909a), 2022-01-01
Supplement: d2qi00909a1.pdf [file d2qi00909a1.pdf]

**Table S1.** Crystallographic data for **1[PF<sub>6</sub>]<sub>2</sub>·4/3CH<sub>2</sub>Cl<sub>2</sub>**, **1[PF<sub>6</sub>]<sub>3</sub>·2CH<sub>2</sub>Cl<sub>2</sub>** and **1[PF<sub>6</sub>]<sub>4</sub>·1.29CH<sub>2</sub>Cl<sub>2</sub>**

|                                             | <b>1[PF<sub>6</sub>]<sub>2</sub>·4/3CH<sub>2</sub>Cl<sub>2</sub></b>                                               | <b>1[PF<sub>6</sub>]<sub>3</sub>·2CH<sub>2</sub>Cl<sub>2</sub></b>                                                 | <b>1[PF<sub>6</sub>]<sub>4</sub>·1.29CH<sub>2</sub>Cl<sub>2</sub></b>        |
|---------------------------------------------|--------------------------------------------------------------------------------------------------------------------|--------------------------------------------------------------------------------------------------------------------|------------------------------------------------------------------------------|
| Empirical formula                           | C <sub>93.66</sub> H <sub>101.32</sub> Cl <sub>3.32</sub> F <sub>12</sub> Fe <sub>2</sub> N <sub>10</sub> P<br>6Ru | C <sub>94</sub> H <sub>102</sub> Cl <sub>4</sub> F <sub>18</sub> Fe <sub>2</sub> N <sub>10</sub> P <sub>7</sub> Ru | C <sub>93.29</sub> H <sub>100.59</sub> Cl <sub>2.59</sub> F <sub>24</sub> Fe |
| Formula weight                              | 2111.36                                                                                                            | 2285.21                                                                                                            | 2370.09                                                                      |
| Temperature/K                               | 100                                                                                                                | 293                                                                                                                | 293                                                                          |
| Crystal system                              | monoclinic                                                                                                         | monoclinic                                                                                                         | monoclinic                                                                   |
| Space group                                 | P2 <sub>1</sub> /c                                                                                                 | P2 <sub>1</sub> /n                                                                                                 | P2 <sub>1</sub> /c                                                           |
| a/Å                                         | 15.191(4)                                                                                                          | 15.130(3)                                                                                                          | 24.111(9)                                                                    |
| b/Å                                         | 28.679(7)                                                                                                          | 26.916(5)                                                                                                          | 15.177(5)                                                                    |
| c/Å                                         | 25.451(6)                                                                                                          | 26.802(5)                                                                                                          | 30.586(11)                                                                   |
| α/°                                         | 90                                                                                                                 | 90                                                                                                                 | 90                                                                           |
| β/°                                         | 93.291(4)                                                                                                          | 99.730(4)                                                                                                          | 99.413(8)                                                                    |
| γ/°                                         | 90                                                                                                                 | 90                                                                                                                 | 90                                                                           |
| Volume/Å <sup>3</sup>                       | 11070(5)                                                                                                           | 10758(4)                                                                                                           | 11042(7)                                                                     |
| Z                                           | 4                                                                                                                  | 4                                                                                                                  | 4                                                                            |
| ρ <sub>calc</sub> /cm <sup>3</sup>          | 1.267                                                                                                              | 1.411                                                                                                              | 1.426                                                                        |
| μ/mm <sup>-1</sup>                          | 0.625                                                                                                              | 0.687                                                                                                              | 0.66                                                                         |
| F(000)                                      | 4335.0                                                                                                             | 4668.0                                                                                                             | 4825                                                                         |
| Crystal size/mm                             | 0.25 × 0.2 × 0.17                                                                                                  | 0.31 × 0.25 × 0.18                                                                                                 | 0.31 × 0.24 × 0.18                                                           |
| Radiation                                   | MoKα (λ = 0.71073)                                                                                                 | MoKα (λ = 0.71073)                                                                                                 | MoKα (λ = 0.71073)                                                           |
| 2θ range for data collection/°              | 4.062 to 49.426                                                                                                    | 4.052 to 54.942                                                                                                    | 5.368 to 51.362                                                              |
| Index ranges                                | -17 ≤ h ≤ 15, -33 ≤ k ≤ 33, -29 ≤ l ≤ 29                                                                           | -19 ≤ h ≤ 18, -34 ≤ k ≤ 30, -29 ≤ l ≤ 29                                                                           | -18 ≤ k ≤ 12, -37 ≤ l ≤ 37                                                   |
| Reflections collected                       | 69001                                                                                                              | 108081                                                                                                             | 73481                                                                        |
| Independent reflections                     | 18798 [R <sub>int</sub> = 0.0779, R <sub>sigma</sub> = 0.0753]                                                     | 24535 [R <sub>int</sub> = 0.0541, R <sub>sigma</sub> = 0.0502]                                                     | 20850 [R <sub>int</sub> = 0.0635, R <sub>sigma</sub> = 0.0641]               |
| Data/restraints/parameters                  | 18798/50/1170                                                                                                      | 24535/641/1354                                                                                                     | 20850/664/1424                                                               |
| Goodness-of-fit on F <sup>2</sup>           | 1.027                                                                                                              | 1.026                                                                                                              | 1.054                                                                        |
| Final R indexes [I ≥ 2σ(I)]                 | R <sub>1</sub> = 0.0653, wR <sub>2</sub> = 0.1835                                                                  | R <sub>1</sub> = 0.0634, wR <sub>2</sub> = 0.1807                                                                  | R <sub>1</sub> = 0.1003, wR <sub>2</sub> = 0.2349                            |
| Final R indexes [all data]                  | R <sub>1</sub> = 0.0773, wR <sub>2</sub> = 0.2009                                                                  | R <sub>1</sub> = 0.0773, wR <sub>2</sub> = 0.1996                                                                  | R <sub>1</sub> = 0.1293, wR <sub>2</sub> = 0.2629                            |
| Largest diff. peak/hole / e Å <sup>-3</sup> | 1.79/-0.68                                                                                                         | 1.48/-0.65                                                                                                         | 1.85/-0.73                                                                   |

**Table S2.** Crystallographic data for **2[PF<sub>6</sub>]<sub>2</sub>**, **2[PF<sub>6</sub>]<sub>3</sub>** and **2[PF<sub>6</sub>]<sub>4</sub>**

|                                             | <b>2[PF<sub>6</sub>]<sub>1.78</sub>I<sub>0.22</sub>·3CH<sub>2</sub>Cl<sub>2</sub></b>                                            | <b>2[PF<sub>6</sub>]<sub>3</sub>·2CH<sub>2</sub>Cl<sub>2</sub></b>                                                 | <b>2[PF<sub>6</sub>]<sub>4</sub>·2CH<sub>2</sub>Cl<sub>2</sub></b>                                                 |
|---------------------------------------------|----------------------------------------------------------------------------------------------------------------------------------|--------------------------------------------------------------------------------------------------------------------|--------------------------------------------------------------------------------------------------------------------|
| Empirical formula                           | C <sub>97</sub> H <sub>108</sub> Cl <sub>6</sub> F <sub>10.7</sub> Fe <sub>2</sub> I <sub>0.22</sub> N <sub>10</sub> P<br>5.78Ru | C <sub>96</sub> H <sub>106</sub> Cl <sub>4</sub> F <sub>18</sub> Fe <sub>2</sub> N <sub>10</sub> P <sub>7</sub> Ru | C <sub>96</sub> H <sub>106</sub> Cl <sub>4</sub> F <sub>24</sub> Fe <sub>2</sub> N <sub>10</sub> P <sub>8</sub> Ru |
| Formula weight                              | 2249.53                                                                                                                          | 2313.26                                                                                                            | 2458.23                                                                                                            |
| Temperature/K                               | 100.00(10)                                                                                                                       | 99.9(4)                                                                                                            | 100.00(10)                                                                                                         |
| Crystal system                              | triclinic                                                                                                                        | monoclinic                                                                                                         | triclinic                                                                                                          |
| Space group                                 | P-1                                                                                                                              | P2 <sub>1</sub> /c                                                                                                 | P-1                                                                                                                |
| a/Å                                         | 15.0345(2)                                                                                                                       | 24.6744(5)                                                                                                         | 15.3832(3)                                                                                                         |
| b/Å                                         | 17.0070(2)                                                                                                                       | 14.7327(3)                                                                                                         | 16.0057(3)                                                                                                         |
| c/Å                                         | 23.0440(3)                                                                                                                       | 30.5899(6)                                                                                                         | 24.4989(4)                                                                                                         |
| α/°                                         | 83.6625(10)                                                                                                                      | 90                                                                                                                 | 79.253(2)                                                                                                          |
| β/°                                         | 85.3617(10)                                                                                                                      | 100.151(2)                                                                                                         | 89.686(2)                                                                                                          |
| γ/°                                         | 71.1101(12)                                                                                                                      | 90                                                                                                                 | 88.327(2)                                                                                                          |
| Volume/Å <sup>3</sup>                       | 5534.36(13)                                                                                                                      | 10946.0(4)                                                                                                         | 5923.76(19)                                                                                                        |
| Z                                           | 2                                                                                                                                | 4                                                                                                                  | 2                                                                                                                  |
| ρ <sub>calc</sub> /cm <sup>3</sup>          | 1.350                                                                                                                            | 1.404                                                                                                              | 1.378                                                                                                              |
| μ/mm <sup>-1</sup>                          | 4.182                                                                                                                            | 3.790                                                                                                              | 3.651                                                                                                              |
| F(000)                                      | 2305.0                                                                                                                           | 4732.0                                                                                                             | 2504.0                                                                                                             |
| Crystal size/mm                             | 0.45 × 0.4 × 0.22                                                                                                                | 0.25 × 0.22 × 0.2                                                                                                  | 0.43 × 0.38 × 0.23                                                                                                 |
| Radiation                                   | GaKα (λ = 1.3405)                                                                                                                | Ga Kα (λ = 1.3405)                                                                                                 | GaKα (λ = 1.3405)                                                                                                  |
| 2θ range for data collection/°              | 4.794 to 120.224                                                                                                                 | 5.104 to 109.644                                                                                                   | 4.888 to 111.678                                                                                                   |
| Index ranges                                | -19 ≤ h ≤ 16, -21 ≤ k ≤ 21, -29 ≤ h ≤ 30, -17 ≤ k ≤ 17, -19 ≤ l ≤ 19                                                             | -35 ≤ l ≤ 37                                                                                                       | -18 ≤ h ≤ 18, -19 ≤ k ≤ 19                                                                                         |
| Reflections collected                       | 76066                                                                                                                            | 62777                                                                                                              | 71749                                                                                                              |
| Independent reflections                     | 24465 [R <sub>int</sub> = 0.0366, R <sub>sigma</sub> = 0.0355]                                                                   | 20728 [R <sub>int</sub> = 0.0355, R <sub>sigma</sub> = 0.0380]                                                     | 23280 [R <sub>int</sub> = 0.1086, R <sub>sigma</sub> = 0.0740]                                                     |
| Data/restraints/parameters                  | 24465/21/1218                                                                                                                    | 20728/478/1305                                                                                                     | 23280/6/1316                                                                                                       |
| Goodness-of-fit on F <sup>2</sup>           | 1.029                                                                                                                            | 1.039                                                                                                              | 1.069                                                                                                              |
| Final R indexes [I ≥ 2σ (I)]                | R <sub>1</sub> = 0.0416, wR <sub>2</sub> = 0.1049                                                                                | R <sub>1</sub> = 0.0672, wR <sub>2</sub> = 0.1896                                                                  | R <sub>1</sub> = 0.0780, wR <sub>2</sub> = 0.2250                                                                  |
| Final R indexes [all data]                  | R <sub>1</sub> = 0.0465, wR <sub>2</sub> = 0.1073                                                                                | R <sub>1</sub> = 0.0807, wR <sub>2</sub> = 0.2000                                                                  | R <sub>1</sub> = 0.0934, wR <sub>2</sub> = 0.2384                                                                  |
| Largest diff. peak/hole / e Å <sup>-3</sup> | 1.39/-1.43                                                                                                                       | 1.47/-1.20                                                                                                         | 1.21/-1.01                                                                                                         |

**Table S3.** Crystallographic data for **3[PF<sub>6</sub>]<sub>2</sub>·4CH<sub>2</sub>Cl<sub>2</sub>**, **3[PF<sub>6</sub>]<sub>3</sub>·3.08CH<sub>2</sub>Cl<sub>2</sub>** and **3[PF<sub>6</sub>]<sub>4</sub>**

|                                             | <b>3[PF<sub>6</sub>]<sub>2</sub>·4CH<sub>2</sub>Cl<sub>2</sub></b>                                                  | <b>3[PF<sub>6</sub>]<sub>3</sub>·3.08CH<sub>2</sub>Cl<sub>2</sub></b>                                     | <b>3[PF<sub>6</sub>]<sub>4</sub></b>                                                               |
|---------------------------------------------|---------------------------------------------------------------------------------------------------------------------|-----------------------------------------------------------------------------------------------------------|----------------------------------------------------------------------------------------------------|
| Empirical formula                           | C <sub>102</sub> H <sub>118</sub> Cl <sub>8</sub> F <sub>12</sub> Fe <sub>2</sub> N <sub>10</sub> P <sub>6</sub> Ru | C <sub>101.08</sub> H <sub>116.16</sub> Cl <sub>6.16</sub> F <sub>18</sub> Fe <sub>2</sub> N <sub>1</sub> | C <sub>98</sub> H <sub>107</sub> F <sub>24</sub> Fe <sub>2</sub> N <sub>10</sub> P <sub>8</sub> Ru |
|                                             |                                                                                                                     | <sub>0</sub> P <sub>7</sub> Ru                                                                            |                                                                                                    |
| Formula weight                              | 2394.25                                                                                                             | 2461.09                                                                                                   | 2341.46                                                                                            |
| Temperature/K                               | 99.9(4)                                                                                                             | 99.9(7)                                                                                                   | 99.9(9)                                                                                            |
| Crystal system                              | monoclinic                                                                                                          | monoclinic                                                                                                | triclinic                                                                                          |
| Space group                                 | P21/n                                                                                                               | C2/c                                                                                                      | P-1                                                                                                |
| a/Å                                         | 24.0100(6)                                                                                                          | 50.6195(4)                                                                                                | 15.1437(3)                                                                                         |
| b/Å                                         | 17.3426(4)                                                                                                          | 14.78570(10)                                                                                              | 15.1742(4)                                                                                         |
| c/Å                                         | 28.3067(7)                                                                                                          | 32.3631(3)                                                                                                | 29.2932(4)                                                                                         |
| α/°                                         | 90                                                                                                                  | 90                                                                                                        | 92.346(2)                                                                                          |
| β/°                                         | 100.424(2)                                                                                                          | 102.6260(10)                                                                                              | 103.657(2)                                                                                         |
| γ/°                                         | 90                                                                                                                  | 90                                                                                                        | 114.623(2)                                                                                         |
| Volume/Å <sup>3</sup>                       | 11592.3(5)                                                                                                          | 23636.2(3)                                                                                                | 5871.9(2)                                                                                          |
| Z                                           | 4                                                                                                                   | 8                                                                                                         | 2                                                                                                  |
| ρ <sub>calc</sub> /cm <sup>3</sup>          | 1.372                                                                                                               | 1.383                                                                                                     | 1.324                                                                                              |
| μ/mm <sup>-1</sup>                          | 4.080                                                                                                               | 3.819                                                                                                     | 3.132                                                                                              |
| F(000)                                      | 4920.0                                                                                                              | 10083.0                                                                                                   | 2394.0                                                                                             |
| Crystal size/mm                             | 0.23 × 0.2 × 0.14                                                                                                   | 0.26 × 0.2 × 0.17                                                                                         | 0.42 × 0.26 × 0.20                                                                                 |
| Radiation                                   | GaKα (λ = 1.3405)                                                                                                   | Ga Kα (λ = 1.3405)                                                                                        | GaKα (λ = 1.3405)                                                                                  |
| 2θ range for data collection/°              | 3.866 to 109.646                                                                                                    | 5.17 to 113.82                                                                                            | 5.466 to 96.27                                                                                     |
| Index ranges                                | -29 ≤ h ≤ 29, -16 ≤ k ≤ 21, -62 ≤ l ≤ 63, -18 ≤ k ≤ 16, -16 ≤ h ≤ 15, -13 ≤ k ≤ 16,                                 |                                                                                                           |                                                                                                    |
|                                             | -34 ≤ l ≤ 34                                                                                                        | -40 ≤ l ≤ 40                                                                                              | -32 ≤ l ≤ 32                                                                                       |
| Reflections collected                       | 60297                                                                                                               | 163979                                                                                                    | 67861                                                                                              |
| Independent reflections                     | 21862 [R <sub>int</sub> = 0.0641, R <sub>sigma</sub> = 0.0626]                                                      | 24154 [R <sub>int</sub> = 0.0484, R <sub>sigma</sub> = 0.0236]                                            | 16848 [R <sub>int</sub> = 0.0684, R <sub>sigma</sub> = 0.0570]                                     |
| Data/restraints/parameters                  | 21862/0/1386                                                                                                        | 24154/672/1528                                                                                            | 16848/302/1205                                                                                     |
| Goodness-of-fit on F <sup>2</sup>           | 1.044                                                                                                               | 1.050                                                                                                     | 2.263                                                                                              |
| Final R indexes [I >= 2σ (I)]               | R <sub>1</sub> = 0.0816, wR <sub>2</sub> = 0.2036                                                                   | R <sub>1</sub> = 0.0738, wR <sub>2</sub> = 0.2156                                                         | R <sub>1</sub> = 0.1641, wR <sub>2</sub> = 0.4787                                                  |
| Final R indexes [all data]                  | R <sub>1</sub> = 0.0950, wR <sub>2</sub> = 0.2124                                                                   | R <sub>1</sub> = 0.0787, wR <sub>2</sub> = 0.2200                                                         | R <sub>1</sub> = 0.1800, wR <sub>2</sub> = 0.4982                                                  |
| Largest diff. peak/hole / e Å <sup>-3</sup> | 2.01/-1.20                                                                                                          | 3.61/-1.11                                                                                                | 5.09/-1.53                                                                                         |

**Table S4.** Crystallographic data for **4[PF<sub>6</sub>]<sub>2</sub>** and **4[PF<sub>6</sub>]<sub>4</sub>**

|                                             | <b>4[PF<sub>6</sub>]<sub>2</sub>·CH<sub>2</sub>Cl<sub>2</sub></b>                                                   | <b>4[PF<sub>6</sub>]<sub>4</sub></b>                                                                |
|---------------------------------------------|---------------------------------------------------------------------------------------------------------------------|-----------------------------------------------------------------------------------------------------|
| Empirical formula                           | C <sub>101</sub> H <sub>116</sub> Cl <sub>2</sub> F <sub>12</sub> Fe <sub>2</sub> N <sub>10</sub> P <sub>6</sub> Ru | C <sub>100</sub> H <sub>114</sub> F <sub>24</sub> Fe <sub>2</sub> N <sub>10</sub> P <sub>8</sub> Ru |
| Formula weight                              | 2167.52                                                                                                             | 2372.54                                                                                             |
| Temperature/K                               | 99.9(5)                                                                                                             | 99.9(5)                                                                                             |
| Crystal system                              | monoclinic                                                                                                          | monoclinic                                                                                          |
| Space group                                 | P2 <sub>1</sub> /c                                                                                                  | P2 <sub>1</sub> /c                                                                                  |
| a/Å                                         | 13.16908(10)                                                                                                        | 31.5906(4)                                                                                          |
| b/Å                                         | 53.1540(5)                                                                                                          | 14.49020(10)                                                                                        |
| c/Å                                         | 14.27640(11)                                                                                                        | 27.6689(3)                                                                                          |
| α/°                                         | 90                                                                                                                  | 90                                                                                                  |
| β/°                                         | 93.4916(7)                                                                                                          | 109.893(2)                                                                                          |
| γ/°                                         | 90                                                                                                                  | 90                                                                                                  |
| Volume/Å <sup>3</sup>                       | 9974.77(15)                                                                                                         | 11909.8(3)                                                                                          |
| Z                                           | 4                                                                                                                   | 4                                                                                                   |
| ρ <sub>calc</sub> /cm <sup>3</sup>          | 1.443                                                                                                               | 1.323                                                                                               |
| μ/mm <sup>-1</sup>                          | 3.667                                                                                                               | 3.146                                                                                               |
| F(000)                                      | 4480.0                                                                                                              | 4864.0                                                                                              |
| Crystal size/mm                             | 0.34 × 0.25 × 0.2                                                                                                   | 0.23 × 0.2 × 0.15                                                                                   |
| Radiation                                   | Ga Kα (λ = 1.3405)                                                                                                  | GaKα (λ = 1.3405)                                                                                   |
| 2θ range for data collection/°              | 5.582 to 113.818                                                                                                    | 5.172 to 121.63                                                                                     |
| Index ranges                                | -16 ≤ h ≤ 15, -64 ≤ k ≤ 66, -40 ≤ l ≤ 41, -14 ≤ m ≤ 18,<br>-17 ≤ n ≤ 17                                             | -35 ≤ l ≤ 35                                                                                        |
| Reflections collected                       | 81603                                                                                                               | 96294                                                                                               |
| Independent reflections                     | 20380 [R <sub>int</sub> = 0.0367,<br>R <sub>sigma</sub> = 0.0327]                                                   | 26750 [R <sub>int</sub> = 0.0380,<br>R <sub>sigma</sub> = 0.0363]                                   |
| Data/restraints/parameters                  | 20380/180/1278                                                                                                      | 26750/1016/1573                                                                                     |
| Goodness-of-fit on F <sup>2</sup>           | 1.021                                                                                                               | 1.028                                                                                               |
| Final R indexes [I ≥ 2σ (I)]                | R <sub>1</sub> = 0.0336, wR <sub>2</sub> = 0.0780                                                                   | R <sub>1</sub> = 0.0572, wR <sub>2</sub> = 0.1411                                                   |
| Final R indexes [all data]                  | R <sub>1</sub> = 0.0381, wR <sub>2</sub> = 0.0799                                                                   | R <sub>1</sub> = 0.0774, wR <sub>2</sub> = 0.1517                                                   |
| Largest diff. peak/hole / e Å <sup>-3</sup> | 0.61/-0.66                                                                                                          | 0.84/-0.92                                                                                          |

**Table S5.** Crystallographic data for **5[PF<sub>6</sub>]<sub>2</sub>·5CH<sub>2</sub>Cl<sub>2</sub>**, **5[PF<sub>6</sub>]<sub>3</sub>·3.38CH<sub>2</sub>Cl<sub>2</sub>·0.62H<sub>2</sub>O** and **5[PF<sub>6</sub>]<sub>4</sub>**

|                                             | <b>5[PF<sub>6</sub>]<sub>2</sub>·5CH<sub>2</sub>Cl<sub>2</sub></b>                                                   | <b>5[PF<sub>6</sub>]<sub>3</sub>·3.38CH<sub>2</sub>Cl<sub>2</sub>·0.62H<sub>2</sub>O</b>                                                       | <b>5[PF<sub>6</sub>]<sub>4</sub></b>                                                                |
|---------------------------------------------|----------------------------------------------------------------------------------------------------------------------|------------------------------------------------------------------------------------------------------------------------------------------------|-----------------------------------------------------------------------------------------------------|
| Empirical formula                           | C <sub>107</sub> H <sub>128</sub> N <sub>10</sub> F <sub>12</sub> P <sub>6</sub> Cl <sub>10</sub> Fe <sub>2</sub> Ru | C <sub>105.38</sub> H <sub>124.76</sub> Cl <sub>6.76</sub> F <sub>18</sub> Fe <sub>2</sub> N <sub>10</sub> O <sub>0.62</sub> P <sub>7</sub> Ru | C <sub>102</sub> H <sub>118</sub> F <sub>24</sub> Fe <sub>2</sub> N <sub>10</sub> P <sub>8</sub> Ru |
| Formula weight                              | 2535.28                                                                                                              | 2552.59                                                                                                                                        | 2400.59                                                                                             |
| Temperature/K                               | 100                                                                                                                  | 100                                                                                                                                            | 232                                                                                                 |
| Crystal system                              | monoclinic                                                                                                           | monoclinic                                                                                                                                     | monoclinic                                                                                          |
| Space group                                 | Pc                                                                                                                   | P2/n                                                                                                                                           | P2 <sub>1</sub> /c                                                                                  |
| a/Å                                         | 12.675(8)                                                                                                            | 14.3274(5)                                                                                                                                     | 13.158(3)                                                                                           |
| b/Å                                         | 14.806(9)                                                                                                            | 16.9831(7)                                                                                                                                     | 31.130(7)                                                                                           |
| c/Å                                         | 31.517(19)                                                                                                           | 24.1522(8)                                                                                                                                     | 31.153(7)                                                                                           |
| α/°                                         | 90                                                                                                                   | 90.0000(10)                                                                                                                                    | 90                                                                                                  |
| β/°                                         | 96.885(11)                                                                                                           | 95.981(2)                                                                                                                                      | 94.169(5)                                                                                           |
| γ/°                                         | 90                                                                                                                   | 90.0000(10)                                                                                                                                    | 90                                                                                                  |
| Volume/Å <sup>3</sup>                       | 5872(6)                                                                                                              | 5844.8(4)                                                                                                                                      | 12727(5)                                                                                            |
| Z                                           | 2                                                                                                                    | 2                                                                                                                                              | 4                                                                                                   |
| ρ <sub>calc</sub> /cm <sup>3</sup>          | 1.434                                                                                                                | 1.450                                                                                                                                          | 1.253                                                                                               |
| μ/mm <sup>-1</sup>                          | 0.749                                                                                                                | 0.555                                                                                                                                          | 0.521                                                                                               |
| F(000)                                      | 2608.0                                                                                                               | 2620.0                                                                                                                                         | 4928.0                                                                                              |
| Crystal size/mm                             | 0.4 × 0.32 × 0.25                                                                                                    | 0.21 × 0.15 × 0.02                                                                                                                             | 0.32 × 0.26 × 0.22                                                                                  |
| Radiation                                   | MoKα (λ = 0.71073)                                                                                                   | synchrotron (λ = 0.65247)                                                                                                                      | MoKα (λ = 0.71073)                                                                                  |
| 2θ range for data collection/°              | 5.182 to 49.996                                                                                                      | 3.114 to 49.692                                                                                                                                | 4.708 to 49.426                                                                                     |
| Index ranges                                | -13 ≤ h ≤ 15, -17 ≤ k ≤ 17, -37 ≤ l ≤ 36                                                                             | -18 ≤ h ≤ 18, -21 ≤ k ≤ 21, -31 ≤ l ≤ 31                                                                                                       | -15 ≤ h ≤ 15, -36 ≤ k ≤ 36, -34 ≤ l ≤ 36                                                            |
| Reflections collected                       | 36579                                                                                                                | 89968                                                                                                                                          | 79976                                                                                               |
| Independent reflections                     | 16458 [R <sub>int</sub> = 0.0701, R <sub>sigma</sub> = 0.1080]                                                       | 12568 [R <sub>int</sub> = 0.0863, R <sub>sigma</sub> = 0.0423]                                                                                 | 21556 [R <sub>int</sub> = 0.0828, R <sub>sigma</sub> = 0.0801]                                      |
| Data/restraints/parameters                  | 16458/12/1334                                                                                                        | 12568/43/707                                                                                                                                   | 21556/157/1342                                                                                      |
| Goodness-of-fit on F <sup>2</sup>           | 0.994                                                                                                                | 1.044                                                                                                                                          | 1.029                                                                                               |
| Final R indexes [I ≥ 2σ (I)]                | R <sub>1</sub> = 0.0849, wR <sub>2</sub> = 0.1756                                                                    | R <sub>1</sub> = 0.0701, wR <sub>2</sub> = 0.1793                                                                                              | R <sub>1</sub> = 0.0868, wR <sub>2</sub> = 0.2338                                                   |
| Final R indexes [all data]                  | R <sub>1</sub> = 0.1001, wR <sub>2</sub> = 0.1897                                                                    | R <sub>1</sub> = 0.0824, wR <sub>2</sub> = 0.1882                                                                                              | R <sub>1</sub> = 0.1089, wR <sub>2</sub> = 0.2626                                                   |
| Largest diff. peak/hole / e Å <sup>-3</sup> | 1.51/-1.11                                                                                                           | 1.18/-1.22                                                                                                                                     | 1.57/-0.94                                                                                          |

**Table S6.** Selected Bond Lengths for  $1^{n+}$  -  $5^{n+}$  ( $n = 2, 3$ ) and  $3^{4+}$  -  $5^{4+}$ .

|                 | Fe1-P <sup>[a]</sup> | Fe2-P <sup>[a]</sup> | Fe1-N1 <sup>[b]</sup> | Fe2-N2 <sup>[b]</sup> | Ru-C1 <sup>[b]</sup> | Ru-C2 <sup>[b]</sup> |
|-----------------|----------------------|----------------------|-----------------------|-----------------------|----------------------|----------------------|
| 1 <sup>2+</sup> | 2.1918(13)           | 2.2055(14)           | 1.943(4)              | 1.931(4)              | 2.045(5)             | 2.043(4)             |
| 1 <sup>3+</sup> | 2.2584(10)           | 2.2048(10)           | 1.888 (3)             | 1.924(3)              | 1.984(3)             | 2.071(3)             |
| 1 <sup>4+</sup> | 2.263(2)             | 2.259(2)             | 1.876(5)              | 1.873(5)              | 1.972(7)             | 2.022(7)             |
| 2 <sup>2+</sup> | 2.1957(6)            | 2.1954(6)            | 1.924(2)              | 1.927(2)              | 2.037(2)             | 2.037(2)             |
| 2 <sup>3+</sup> | 2.2476(13)           | 2.2154(13)           | 1.890(4)              | 1.914(4)              | 1.993(4)             | 2.058(4)             |
| 2 <sup>4+</sup> | 2.2723(12)           | 2.2509(13)           | 1.900(3)              | 1.908(3)              | 2.010(4)             | 2.025(4)             |
| 3 <sup>2+</sup> | 2.1968(17)           | 2.1982(14)           | 1.945(4)              | 1.949(4)              | 2.062(6)             | 2.063(5)             |
| 3 <sup>3+</sup> | 2.2624(12)           | 2.2073(12)           | 1.913(4)              | 1.942(4)              | 2.000(4)             | 2.067(4)             |
| 3 <sup>4+</sup> | 2.293(6)             | 2.269(4)             | 1.890(11)             | 1.933(11)             | 1.986(13)            | 2.001(12)            |
| 4 <sup>2+</sup> | 2.2196(6)            | 2.2242(5)            | 1.9480(14)            | 1.9557(17)            | 2.0463(19)           | 2.0652(19)           |
| 4 <sup>3+</sup> | —                    | —                    | —                     | —                     | —                    | —                    |
| 4 <sup>4+</sup> | 2.2817(11)           | 2.2878(11)           | 1.918(3)              | 1.914(3)              | 2.023(3)             | 2.018(3)             |
| 5 <sup>2+</sup> | 2.231(5)             | 2.234(4)             | 1.953(12)             | 1.946(11)             | 2.054(14)            | 2.060(14)            |
| 5 <sup>3+</sup> | 2.2663(12)           | —                    | 1.926(3)              | —                     | 2.041(4)             | —                    |
| 5 <sup>4+</sup> | 2.3119(16)           | 2.3224(17)           | 1.934(4)              | 1.919(4)              | 2.037(5)             | 2.003(5)             |

[a] average Fe-P bond length.

[b] N1 and N2 are nitrogen atoms of the CN bridges, so as the C1 and C2.

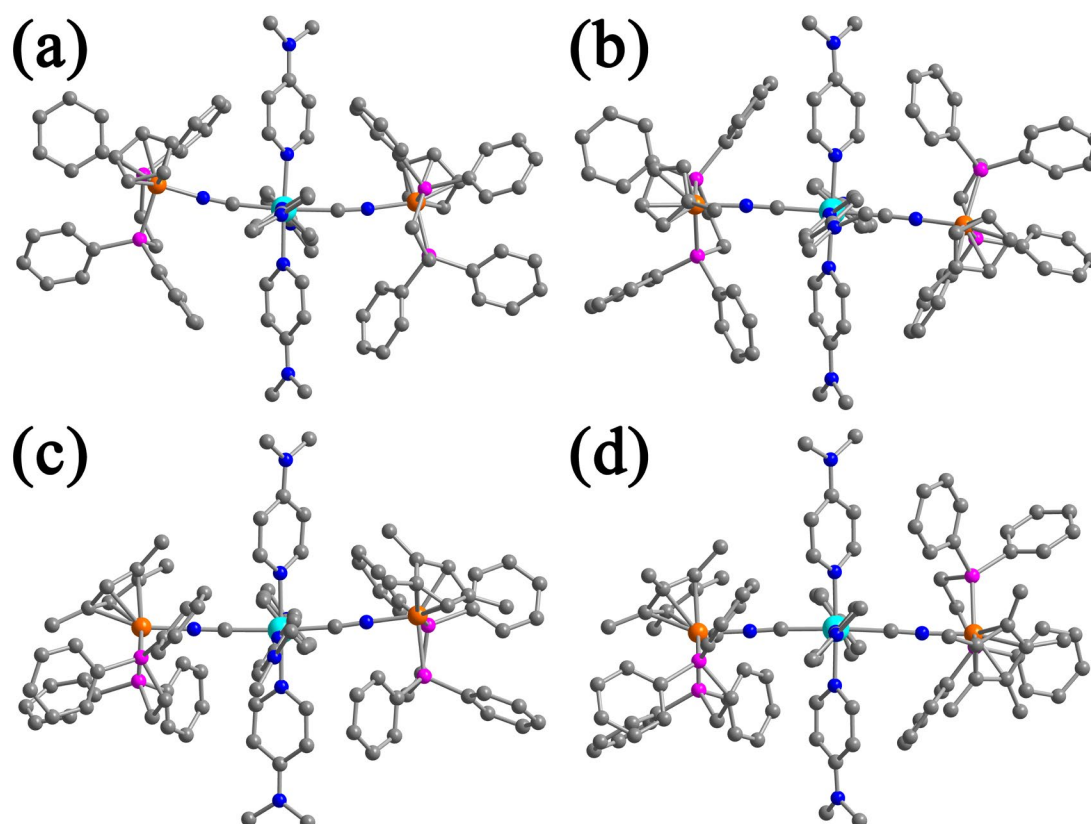

**Figure S1.** (a), (b), (c), (d) Molecular structure of  $1^{3+}$ ,  $2^{3+}$ ,  $3^{3+}$ ,  $5^{3+}$ , respectively. Hydrogen atoms,  $[PF_6]^-$  anions, and solvent molecules have been omitted for clarity. Light blue, Ru; orange, Fe; pink, P; gray, C; blue, N.

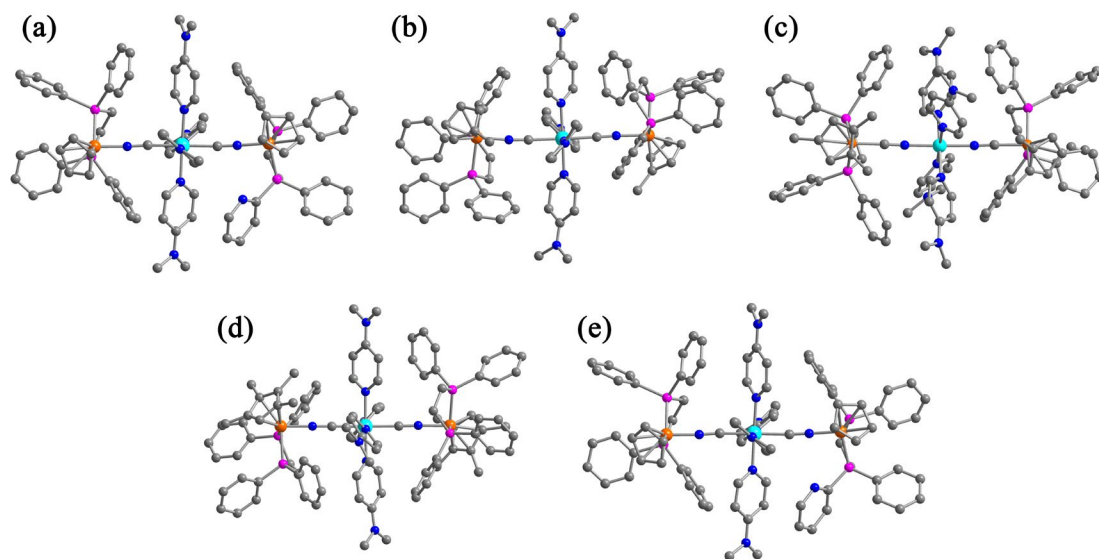

**Figure S2.** (a), (b), (c), (d), (e) Molecular structure of  $1^{4+}$ ,  $2^{4+}$ ,  $3^{4+}$ ,  $4^{4+}$ ,  $5^{4+}$ , respectively. Hydrogen atoms,  $[\text{PF}_6]^-$  anions, and solvent molecules have been omitted for clarity. Light blue, Ru; orange, Fe; pink, P; gray, C; blue, N.

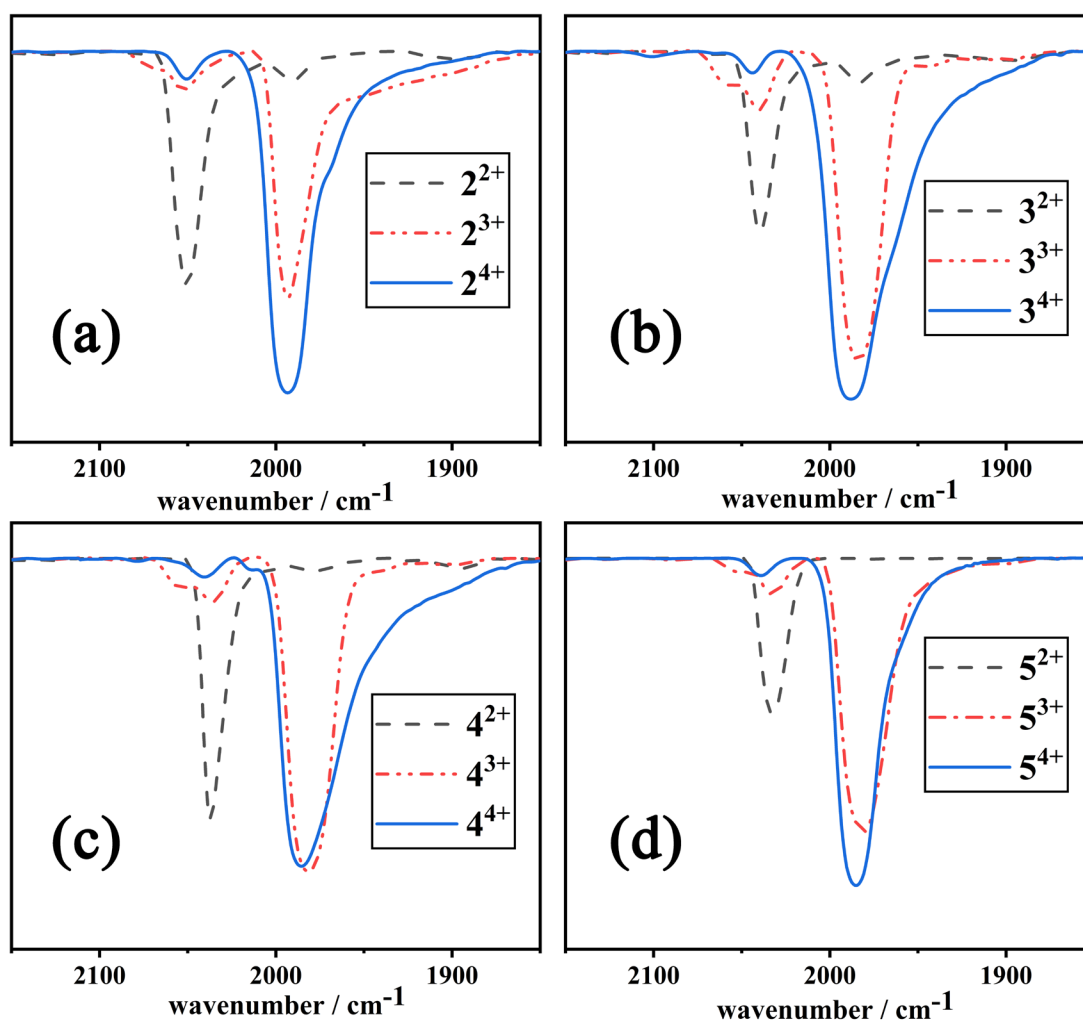

**Figure S3.** The  $\nu(\text{CN})$  bands in solid state.

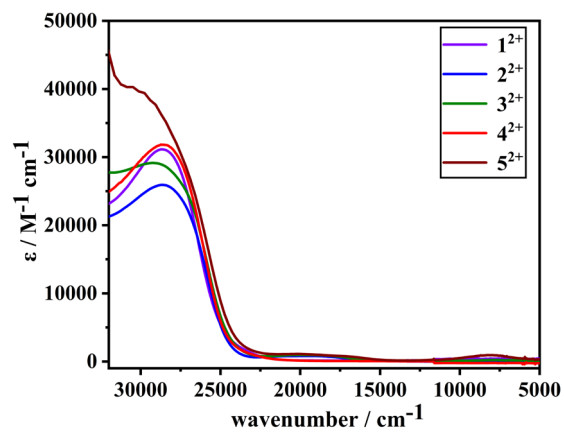

Figure S4. UV/Vis/NIR spectra of the  $1^{2+}$ - $5^{2+}$  in  $\text{CH}_2\text{Cl}_2$ .

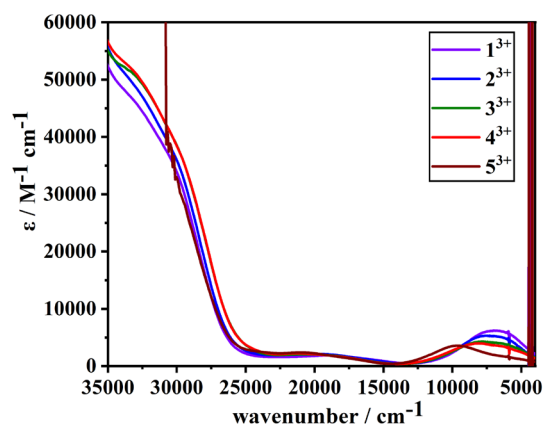

Figure S5. UV/Vis/NIR spectra of the  $1^{3+}$ - $5^{3+}$  in  $\text{CH}_2\text{Cl}_2$ .

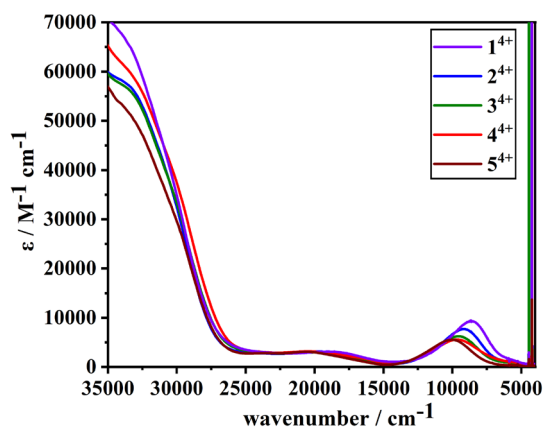

Figure S6. UV/Vis/NIR spectra of the  $1^{4+}$ - $5^{4+}$  in  $\text{CH}_2\text{Cl}_2$ .



**Table S7.**  $^{57}\text{Fe}$  Mössbauer Fitting Parameters for Selected Complexes

|                       | IS (mm.s <sup>-1</sup> ) | QS (mm.s <sup>-1</sup> ) | Relative Area (%) |
|-----------------------|--------------------------|--------------------------|-------------------|
| <b>1<sup>2+</sup></b> | 0.39                     | 1.87                     | 100               |
| <b>1<sup>3+</sup></b> | 0.37                     | 1.87                     | 49.6              |
|                       | 0.32                     | 0.74                     | 50.4              |
| <b>1<sup>4+</sup></b> | 0.30                     | 0.76                     | 100               |
| <b>5<sup>2+</sup></b> | 0.37                     | 1.93                     | 100               |
| <b>5<sup>3+</sup></b> | 0.38                     | 1.95                     | 49.1              |
|                       | 0.37                     | 0.72                     | 50.9              |
| <b>5<sup>4+</sup></b> | 0.36                     | 0.76                     | 100               |

**Table S8.** Mulliken spin densities of the MV compounds.

|                       | Ru       | Fe1      | Fe2      |
|-----------------------|----------|----------|----------|
| <b>1<sup>3+</sup></b> | 0.162964 | 0.946180 | 0.009151 |
| <b>2<sup>3+</sup></b> | 0.167755 | 0.924511 | 0.028568 |
| <b>3<sup>3+</sup></b> | 0.080989 | 1.095698 | 0.007498 |
| <b>5<sup>3+</sup></b> | 0.080253 | 1.127621 | 0.017721 |
| <b>1<sup>4+</sup></b> | 0.088287 | 1.076182 | 1.095622 |
| <b>2<sup>4+</sup></b> | 0.058455 | 1.126289 | 1.100173 |
| <b>3<sup>4+</sup></b> | 0.042816 | 1.194779 | 1.230900 |
| <b>4<sup>4+</sup></b> | 0.042165 | 1.207083 | 1.160610 |
| <b>5<sup>4+</sup></b> | 0.038554 | 1.256374 | 1.254484 |

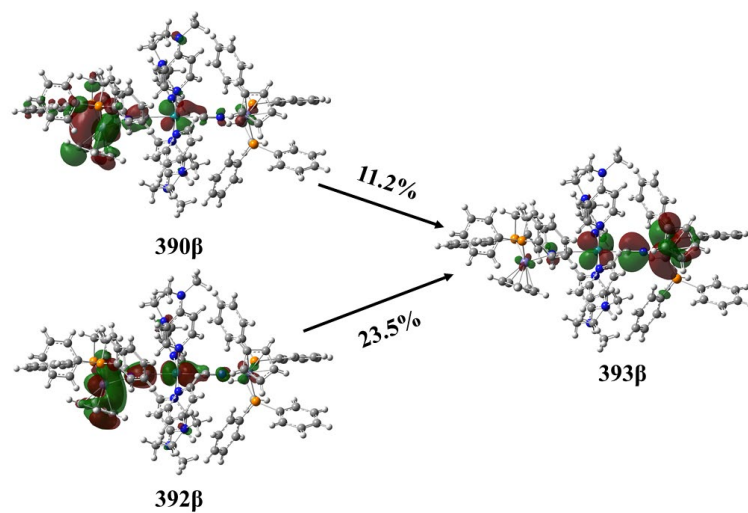

**Figure S7.** The major electronic transitions corresponding to the NIR band ( $\lambda = 1475$  nm,  $f = 0.0945$ ) of  $1^{3+}$ .

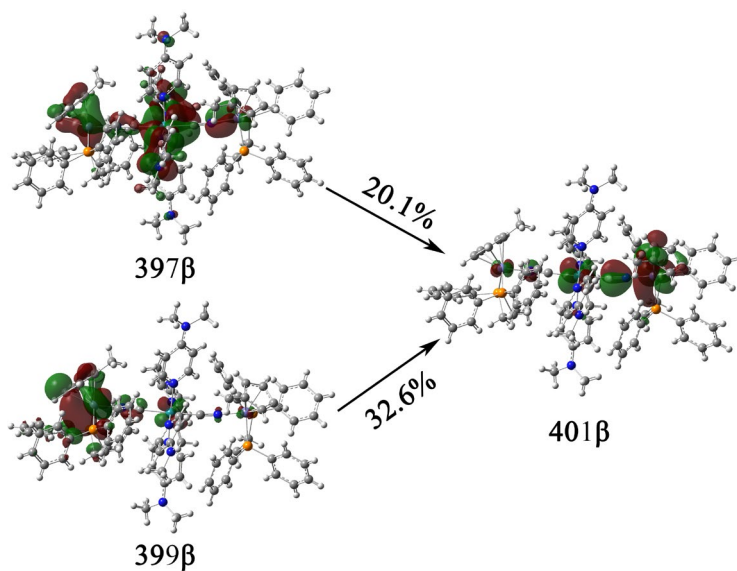

**Figure S8.** The major electronic transitions corresponding to the NIR band ( $\lambda = 1316.44$  nm,  $f = 0.0250$ ) of  $2^{3+}$ .

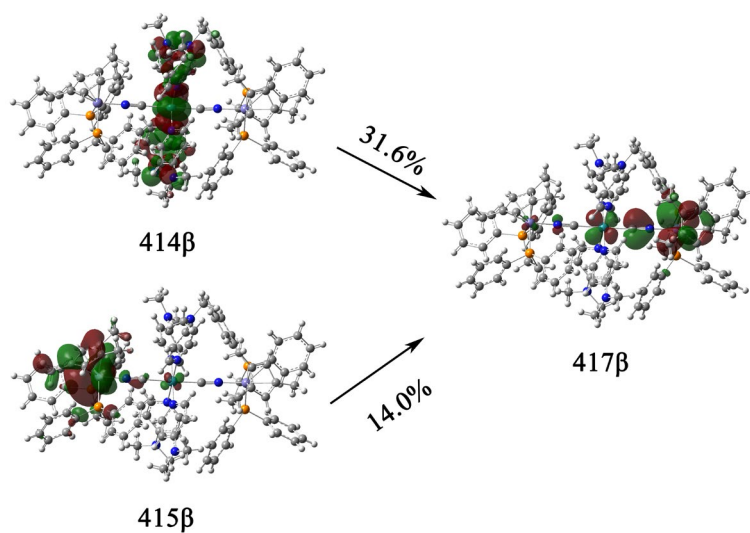

**Figure S9.** The major electronic transitions corresponding to the NIR band ( $\lambda = 1195.94$  nm,  $f = 0.0103$ ) of  $3^{3+}$ .

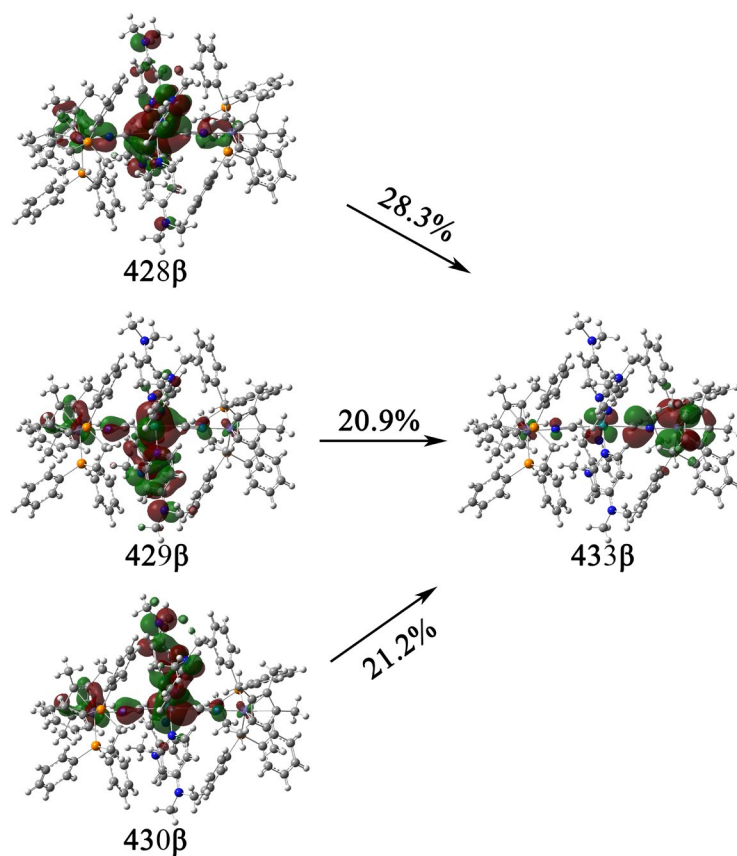

**Figure S10.** The major electronic transitions corresponding to the NIR band ( $\lambda = 992.52$  nm,  $f = 0.0363$ ) of  $5^{3+}$ .

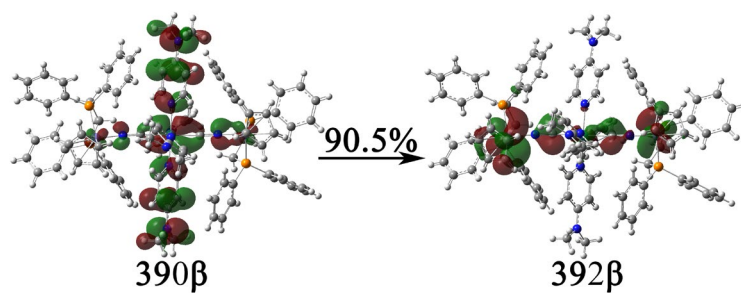

**Figure S11.** The major electronic transitions corresponding to the NIR band of ( $\lambda = 876.33$  nm,  $f = 0.1137$ ) of  $1^{4+}$ .

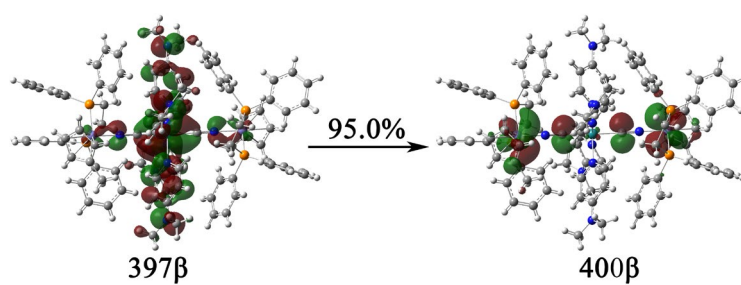

**Figure S12.** The major electronic transitions corresponding to the NIR band ( $\lambda = 785.08$  nm,  $f = 0.1089$ ) of  $2^{4+}$ .

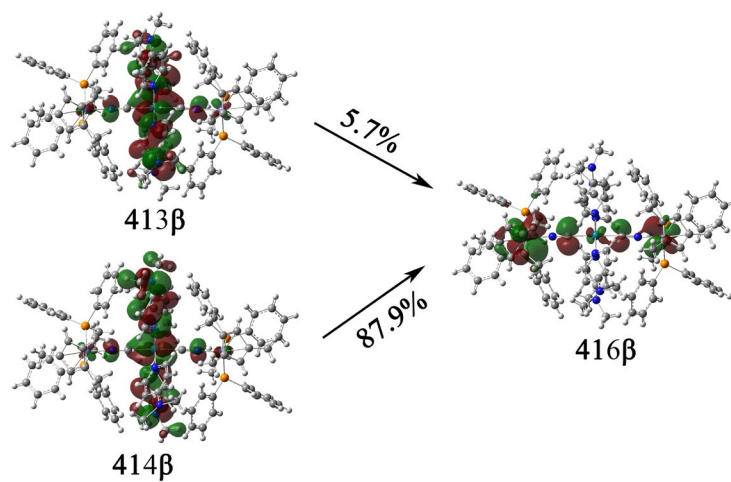

**Figure S13.** The major electronic transitions corresponding to the NIR band ( $\lambda = 685.21$  nm,  $f = 0.0627$ ) of  $3^{4+}$ .

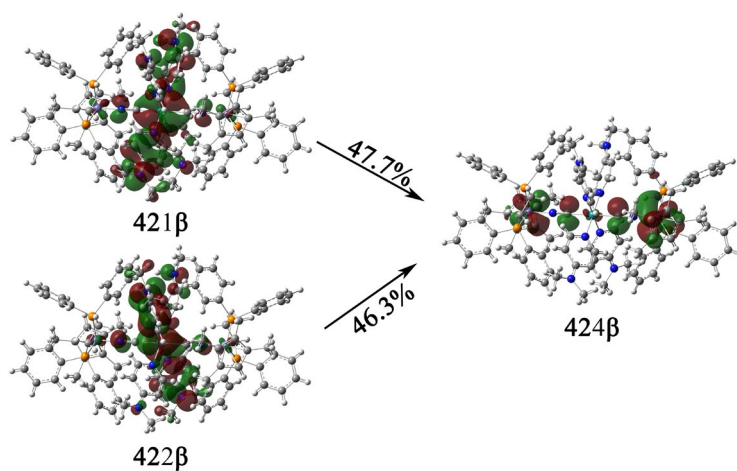

**Figure S14.** The major electronic transitions corresponding to the NIR band ( $\lambda = 691.77$  nm,  $f = 0.0868$ ) of  $4^{4+}$ .

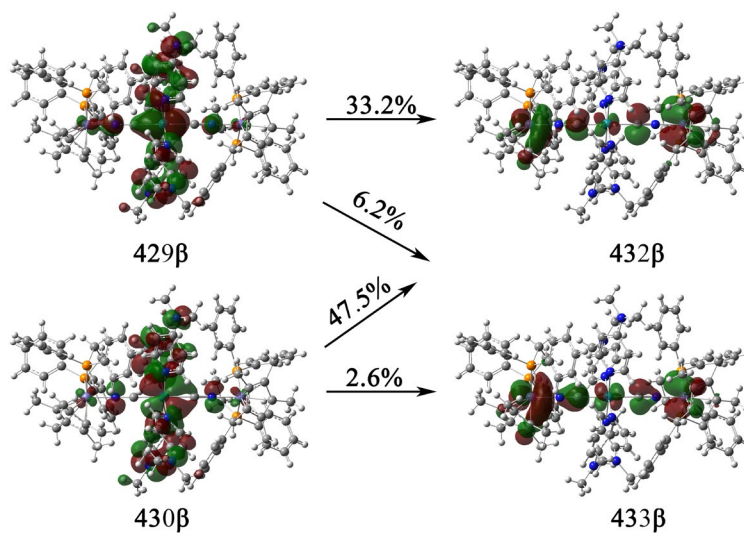

**Figure S15.** The major electronic transitions corresponding to the NIR band ( $\lambda = 611.57$  nm,  $f = 0.1066$ ) of  $5^{4+}$ .
